# Supplementary material
Source: publisher site journal article supplement (https://www.dovepress.com/article/429120)
Supplement: Supplementary file 1 [file get_supplementary_file.php]

**SUPPORTIVE INFORMATION**

**Title:** Development and Validation of a Patient-Reported Outcome Measure for Fingernail and Toenail Conditions: the NAIL-Q

**Authors:**

Anne F Klassen1, Charlene Rae1, Maureen O’Malley2, Trisia Breitkopf1, Leah Algu1, Jasmine Mansouri3, Claire R Brown4, Yi Wang5, Shari R. Lipner4

1Department of Pediatrics, McMaster University

2 Division of Dermatology, Department of Medicine, McMaster University

3Schulich School of Medicine and Dentistry, Western University

4Department of Dermatology, Weill Cornell Medicine

5Department of Health Research Methods, Evidence, and Impact, McMaster University

**Corresponding Author**: Anne F Klassen, McMaster University, 3N27, 1200 Main Street W, Hamilton, ON, Canada, L8N 3Z5, [aklass@mcmaster.ca](mailto:aklass@mcmaster.ca)

**Table S1: Semi-structured interview guide**

| **NAIL CONDITION** |
| --- |
| 1. Can you describe your nail condition to me? 2. How long have you had this condition? 3. What kinds of treatments have you had/will you have in the future for your nail condition? 4. How happy/satisfied have you been with each treatment(s)? |
| **SYMPTOMS/FUNCTION** |
| 1. Can you describe any symptoms and sensations you experience with your nail condition? Probe as needed: pain, swelling, numbness, itch, odor etc. For each symptom/sensation, how bad is it (eg, intensity/severity/frequency). For each symptom/sensation, how does it interfere in your daily life? 2. Can you describe any functional problems you have using your hands/feet? Probe: activities of daily living, self-care, walk, exercise, range of motion etc. 3. Do you use any accommodations such as special footwear, gloves, etc? 4. What issues do you experience with regards to taking care of your nails? |
| **APPEARANCE** |
| 1. How would you describe how your nails looks? Probe: before and after treatment for contour, colour, shape, scenarios, size, shape, qualitative, surrounding skin, symmetry, visibility. 2. How have your toenails affected what kind of shoes you wear? 3. What do you like/dislike about the appearance of your nails? 4. What would you like to change about the appearance of your nails? |
| **PSYCHOLOGICAL** |
| 1. Can you describe if/how your nails (how it looks and feels) affects you emotionally? Probe as needed: negative (distress, feel down, irritation) and positive (happy, vibrant) emotions; negative (self-conscious, embarrassed) and positive (confident, attractive) body image concerns; concealment behaviours (gloves, shoes, makeup, polish). 2. For any nail treatments you have had, can you describe any changes in your psychological wellbeing and how you feel about yourself? Probe as needed: for positive (feel better, happier, more confident, attractive) and negative (feel worse, self-conscious, unattractive) 3. How big were these changes and how long did they last? |
| **SOCIAL** |
| 1. Thinking about your nails (how it looks/feels), can you describe any impacts on social interactions with people? Probe as needed: positive (more confident, go out more, making friends, recreation, shake hands, dating) and negative (isolation, stay in, stigmatized, avoidance) 2. Do people stare or notice your nails? 3. How have you felt supported or not supported by people in your life? 4. Does your nail condition (how it looks/feels) have any impact on your work life? Please describe these. |
| **GENERAL** |
| 1. Can you describe any other concerns or issues you experienced that we have not already covered? 2. Thinking back over what you have talked about in this interview, what would you say are the most/least important concerns in relation to your nail condition? |

**Figure S1 REDCap survey images to aid participants in identifying nail condition**

**
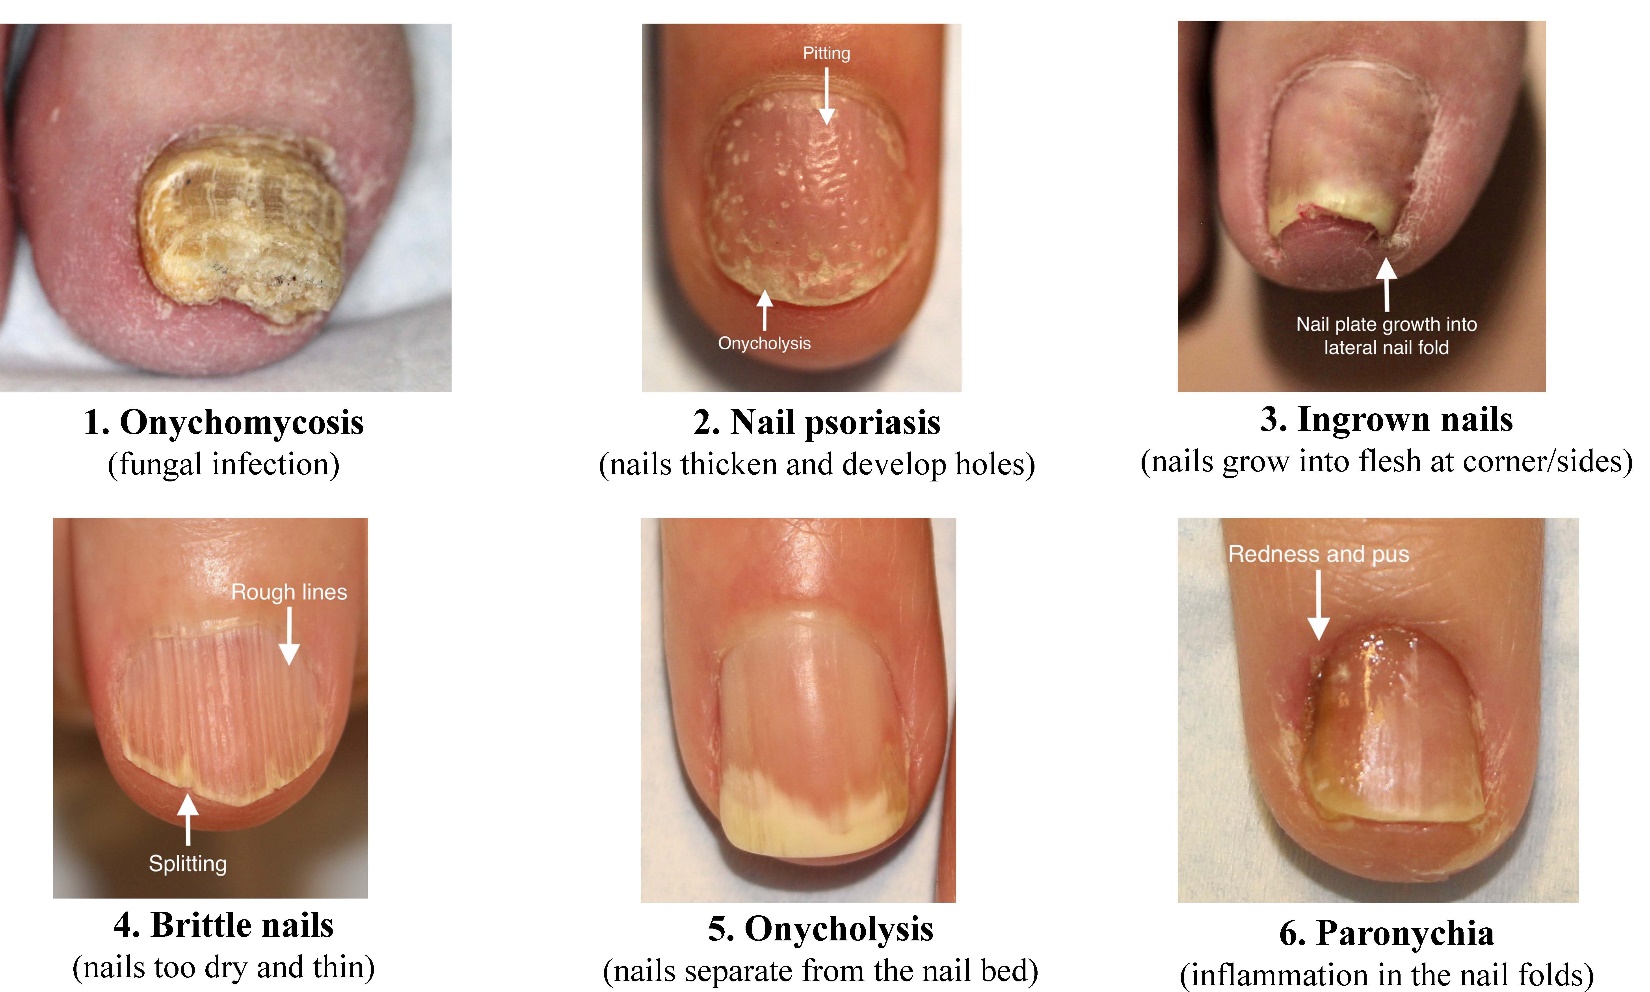
**

**Table S2: Sample characteristics for phase 1 qualitative study**

|  |  | Number |
| --- | --- | --- |
| **COUNTRY** | Canada | 5 |
| USA | 18 |
| **AGE** | <49 | 6 |
| 50-59 | 3 |
| 60-69 | 6 |
| >70 | 8 |
| **GENDER** | Woman | 19 |
| Man | 4 |
| **RACE** | White | 16 |
| Black / African American | 2 |
| Hispanic / Latino1 | 4 |
| Other | 1 |
| **CONDITION** | Brittle nails | 4 |
| Dystrophy | 1 |
| Ingrown toenails | 1 |
| Lichen Planus | 3 |
| Onychomycosis | 8 |
| Onychopapilloma | 1 |
| Onychophagia | 1 |
| Onychorrhexis | 1 |
| Psoriasis | 3 |
| Trachyonychia | 1 |
| Trauma | 1 |
| **SEVERITY BEFORE TREATMENT** | Mild | 6 |
| Moderate | 8 |
| Severe | 11 |
| **TIME SINCE DIAGNOSIS, YEARS*** | <1 | 2 |
| 1-5 | 13 |
| >5 | 10 |
| **NAILS AFFECTED** | Fingernails | 21 |
| Toenails | 9 |
| Both | 7 |
| **NUMBER FINGERNAILS AFFECTED*** | One | 5 |
| Some | 7 |
| All | 8 |
| **NUMBER TOENAILS AFFECTED*** | One | 0 |
| Some | 6 |
| All | 2 |

Note: 2 participants had 2 nail conditions; * data missing for 1 participant

**Table S3:** Item revision during each round

| **ROUND 1** | **Decision** | **ROUND 2** | **Decision** | **ROUND 3** | **Decision** | **FIELD-TEST** | **FINAL** |
| --- | --- | --- | --- | --- | --- | --- | --- |
| **APPEARANCE** |  |  |  |  |  |  |  |
| How smooth the surface of your nails look (no ridges, indents or pits)? | retain |  | retain |  | retain |  | retain |
| The thickness of your nails? | retain |  | retain |  | retain |  | retain |
| How even the surface of the nails looks? | retain |  | retain |  | retain |  | retain |
| How your nails look up close? | retain |  | retain |  | retain |  | retain |
| How clear your nails look (no spots or stripes)? | retain |  | retain |  | retain |  | retain |
| How strong your nails are? | retain |  | retain |  | retain |  | retain |
| How hard your nails are? | retain |  | retain |  | retain |  | retain |
| How normal your nails look? | retain |  | retain |  | retain |  | retain |
| How healthy your nails are? | retain |  | retain |  | retain |  | retain |
| The color of your nails? | retain |  | retain |  | retain |  | drop |
| How even colored your nails look? | retain |  | retain |  | retain |  | drop |
| How your nails look under a bright light? | retain |  | retain |  | retain |  | drop |
| How your nails look when you are using your hands (eg, eating, playing cards)? | retain |  | retain |  | retain |  | drop |
| How attractive your nails look? | retain |  | retain |  | retain |  | drop |
| How fast your nails grow? | retain |  | retain |  | retain |  | drop |
| How your nails look if you rest your palms on a table? | retain |  | retain |  | retain |  | drop |
| The length of your nails? | retain |  | retain |  | retain |  | drop |
| How your nails look compared with other people? | revise | How your nails look compared with other people’s nails? | retain |  | retain |  | retain |
| How securely attached your nails are to the nailbed? | revise | How tightly attached your nail(s) are to the nailbed? | retain |  | retain |  | drop |
| How the cuticle/skin around your nails looks? | retain |  | revise | How the skin around your nails looks? | retain |  | drop |
| How clean your nail condition makes your nails look? | drop |  |  |  |  |  |  |
| The shape of your nails? | drop |  |  |  |  |  |  |
| The size of your nails? | drop |  |  |  |  |  |  |
| How well your nails match each other? | drop |  |  |  |  |  |  |
| How your nails look when you hold a glass? | drop |  |  |  |  |  |  |
|  |  |  | add | How your nails look in photos? | retain |  |  |
|  |  |  | add | How your cuticles look (ie, the skin at the bottom edge of your nails)? | retain | How your cuticles look? |  |
| **NAIL DISTRESS** |  |  |  |  |  |  |  |
| I get upset about my nail condition. | retain |  | retain |  | retain |  | retain |
| I dislike when people look at my nails. | retain |  | retain |  | retain |  | retain |
| I dislike how my nails look. | retain |  | retain |  | retain |  | retain |
| I am self-conscious of my nail condition. | retain |  | retain |  | retain |  | retain |
| I am embarrassed about my nail condition. | retain |  | retain |  | retain |  | drop |
| My nail condition interferes with my ability to enjoy life. | retain |  | retain |  | retain |  | drop |
| I worry about having to greet people (eg, shake hands or wave). | retain |  | retain |  | retain |  | drop |
| I worry people might think my nail condition is contagious. | retain |  | retain |  | retain |  | drop |
| I avoid having my nails done (eg, manicure, pedicure). | retain |  | retain |  | retain |  | drop |
| I hide my nails when I am with other people (eg, gloves, keep hands in pocket). | revise | I hide my nails when I am with other people (eg, gloves, shoes, keep hands in pocket). | retain |  | retain |  | drop |
| I am conscious of my nail condition when I am with other people (eg, restaurant, beach). | revise | I am aware of my nail condition when I am with other people (eg, restaurant, beach). | retain |  | retain |  | retain |
| I cover my nails when I go out (eg, nail polish, artificial nails). | drop |  |  |  |  |  |  |
| I dislike when people ask about my nails. | drop |  |  |  |  |  |  |
| I avoid some activities that show my nails. | drop |  |  |  |  |  |  |
|  |  |  | add | I avoid having photos taken that show my nails. | retain |  | retain |
|  |  |  |  |  | add | My nail condition makes me feel frustrated. | retain |
| **NAIL SYMPTOMS** |  |  |  |  |  |  |  |
| Nails that break? | retain |  | retain |  | retain |  | retain |
| Nails that peel (layers)? | retain |  | retain |  | retain |  | retain |
| Nails that split? | retain |  | retain |  | retain |  | retain |
| Nails that chip? | revise | Nails that chip (ie, little pieces come off)? | retain |  | retain |  | retain |
| Skin around the nails that looks swollen? | retain |  | retain |  | retain |  | retain |
| Skin around the nails that bleeds? | retain |  | retain |  | retain |  | retain |
| Nails that cause pain? | retain |  | retain |  | retain |  | retain |
| Nails that come off? | retain |  | retain |  | retain |  | drop |
| Nails and surrounding skin that are infected? | retain |  | retain |  | retain |  | drop |
| Nails that are loose or lifted from the nailbed? | retain |  | retain |  | retain |  | drop |
| Nails that smell? | retain |  | retain |  | retain |  | drop |
| Nails that crack? | drop |  |  |  |  |  |  |
| Skin around the nails that looks inflamed? | drop |  |  |  |  |  |  |
| Nails that are dry? | drop |  |  |  |  |  |  |
| Nails that cause sensitivity? | drop |  |  |  |  |  |  |
|  |  |  | add | Nails that throb? | retain |  | retain |
|  |  |  | add | Skin around the nails that look red? | retain |  | retain |
|  |  |  | add | Nails that cause pain in the tips of your fingers or toes? | retain |  | retain |
|  |  |  | add | Nails that do not grow as fast as you would like? | retain |  | drop |
| **PHYSICAL: FINGERNAILS** |  |  |  |  |  |  |  |
| Buttoning a shirt or coat? | retain |  | retain |  | retain |  | retain |
| Putting on or taking off clothes? | retain |  | retain |  | retain |  | retain |
| Personal grooming (eg, shaving, putting on make-up)? | retain |  | retain |  | retain |  | retain |
| Typing? | retain |  | retain |  | retain |  | retain |
| Preparing food (eg, peeling, cutting)? | retain |  | retain |  | retain |  | drop |
| Gripping handles (eg, tennis racket, golf club, broom)? | retain |  | retain |  | retain |  | drop |
| Writing with a pen or pencil? | retain |  | retain |  | retain |  | drop |
| Scratching an itch? | revise | Using your nails to scratch an itch? | retain |  | retain |  | drop |
| Picking up a coin? | revise | Picking up a small item (eg, coin, pill, button)? | retain |  | retain |  | drop |
| Clipping your fingernails? | revise | Looking after your nails (eg, clip, clean)? | retain |  | retain |  | drop |
| Eating with cutlery (eg, fork, spoon, knife)? | drop |  |  |  |  |  |  |
| Opening a jar? | drop |  |  |  |  |  |  |
| Turning a key in a lock? | drop |  |  |  |  |  |  |
|  | add | Doing chores around the house? | retain |  | retain |  | retain |
|  | add | Being able to get your hands wet (eg, do dishes, wash hands)? | retain |  | retain |  | drop |
|  |  |  | add | Doing your usual daily activities (eg, work, school)? | retain |  | retain |
| **PHYSICAL: TOENAILS** |  |  |  |  |  |  |  |
| Being physically active? | retain |  | retain |  | retain |  | retain |
| Your ability to be independent? | retain |  | retain |  | retain |  | retain |
| Putting on or taking off socks? | retain |  | retain |  | retain |  | drop |
| Your ability to move around? | revise | Your ability to walk or move around? | retain |  | retain |  | retain |
| Your ability to do your usual activities (eg, work, school)? | revise | Doing your usual daily activities (eg, work, school)? | retain |  | retain |  | retain |
| Being able to wear shoes you like? | revise | Being able to wear shoes that cover your toes? | retain |  | retain |  | drop |
| Your ability to do chores around the house? | revise | Doing chores around the house? | retain |  | retain |  | drop |
| Doing activities you enjoy? | revise | Doing activities that you enjoy? | retain |  | retain |  | retain |
| Your ability to clean your nails? | revise | Looking after your nails (eg, clip, clean)? | retain |  | retain |  | drop |
| Putting on or taking off clothes (eg, nails catch or snag)? | drop |  |  |  |  |  |  |
| Your ability to enjoy life? | drop |  |  |  |  |  |  |
| Your social life? | drop |  |  |  |  |  |  |
| Your self-confidence? | drop |  |  |  |  |  |  |
| Your ability to clip your nails? | drop |  |  |  |  |  |  |
| **TREATMENT OUTCOME** |  |  |  |  |  |  |  |
| I wish I had the nail treatment sooner. | retain |  | retain |  | retain |  | drop |
| The results of the nail treatment are great. | retain |  | retain |  | retain |  | drop |
| My nail condition has improved with treatment. | retain |  | retain |  | retain |  | drop |
| I am pleased with the results of the nail treatment. | retain |  | retain |  | retain |  | retain |
| It was worthwhile having the nail treatment. | retain |  | retain |  | retain |  | retain |
| The results of the nail treatment are better than I expected. | retain |  | retain |  | retain |  | retain |
| I am happy with the nail treatment. | revise | I am happy with the result of the nail treatment. | revise | I am glad I had the nail treatment. | retain |  | retain |
| My nails are much better than before the nail treatment. | revise | My nails are better than before the nail treatment. | drop |  |  |  | drop |
|  |  |  | add | The treatment worked for my nail condition. | retain |  | retain |
|  |  |  | add | The treatment was worth the time and effort. | retain |  | retain |
|  |  |  | add | I am happy with how fast the nail treatment worked. | retain |  | drop |
|  |  |  | add | I would have the nail treatment again if I needed to. | retain |  | drop |
|  |  |  | add | I would recommend the nail treatment to other people with my condition. | retain |  | retain |

**Table S4: Item revision during** **3 rounds of participant and expert input**

| Scales | Decisions | Round 1 – participants | Round 2 - experts | Round 3 - participants | Field-test version |
| --- | --- | --- | --- | --- | --- |
| NAIL APPEARANCE |  | n=25 | n =20 | n=22 | n=22 |
| Retain | 18 | 19 | 21 |  |
| Revise | 2 | 1 | 1 |  |
| Drop | 5 | 0 | 0 |  |
| Add | 0 | 2 | 0 |  |
| NAIL DISTRESS |  | n =14 | n=11 | n=12 | n=13 |
| Retain | 9 | 11 | 12 |  |
| Revise | 2 | 0 | 0 |  |
| Drop | 3 | 0 | 0 |  |
| Add | 0 | 1 | 1 |  |
| NAIL SYMPTOMS |  | n=15 | n=11 | n=15 | n=15 |
| Retain | 10 | 11 | 15 |  |
| Revise | 1 | 0 | 0 |  |
| Drop | 4 | 0 | 0 |  |
| Add | 0 | 4 | 0 |  |
| PHYSICAL: FINGERNAILS |  | n =13 | n=12 | n=13 | n=13 |
| Retain | 7 | 12 | 13 |  |
| Revise | 3 | 0 | 0 |  |
| Drop | 3 | 0 | 0 |  |
| Add | 2 | 1 | 0 |  |
| PHYSICAL: TOENAILS |  | n =14 | n=9 | n=9 | n=9 |
| Retain | 3 | 9 | 9 |  |
| Revise | 6 | 0 | 0 |  |
| Drop | 5 | 0 | 0 |  |
| Add | 0 | 0 | 0 |  |
| TREATMENT OUTCOME |  | n=8 | n=8 | n=12 | n=12 |
| Retain | 6 | 6 | 12 |  |
| Revise | 2 | 1 | 0 |  |
| Drop | 0 | 1 | 0 |  |
| Add | 0 | 5 | 0 |  |
| TOTAL |  | 89 | 71 | 83 | 84 |

**Table S5: RMT item level fit statistics and differential item function results**

| **Scales** | **Item Fit Statistics** | | | | | | | **Differential Item Function*** | | | | |
| --- | --- | --- | --- | --- | --- | --- | --- | --- | --- | --- | --- | --- |
| **Item** | **Location** | **SE** | **Fit Residual** | **DF** | **χ2** | **DF** | **p-value** | **Country** | **Age** | **Gender** | **Education** | **Location** |
| **NAIL APPEARANCE** | | | | | | | | | | | |  |
| Clear | -0.47 | 0.05 | 4.89 | 529.4 | 15.0 | 9 | 0.09 | no | no | 1,2,3 | no | 1,2 |
| Hard | -0.42 | 0.05 | 1.90 | 520.4 | 12.9 | 9 | 0.17 | no | no | no | no | 1,2,3 |
| Strong | -0.41 | 0.05 | 3.42 | 530.3 | 14.8 | 9 | 0.10 | no | no | no | no | 1,2,3 |
| Thickness | -0.14 | 0.05 | 0.41 | 531.2 | 8.6 | 9 | 0.47 | no | no | 1,3 | no | no |
| Smooth | -0.10 | 0.05 | 0.43 | 532.0 | 5.1 | 9 | 0.83 | no | no | no | no | no |
| Even surface | -0.03 | 0.05 | -1.05 | 530.3 | 10.3 | 9 | 0.33 | no | no | no | no | no |
| Normal | 0.11 | 0.05 | -1.80 | 531.2 | 8.8 | 9 | 0.45 | no | no | no | no | 1,2,3 |
| Healthy | 0.29 | 0.06 | -3.48 | 532.9 | 15.4 | 9 | 0.08 | no | no | no | no | no |
| Compared | 0.50 | 0.05 | 0.98 | 531.2 | 3.4 | 9 | 0.95 | no | no | no | no | no |
| Up close | 0.66 | 0.05 | -0.96 | 530.3 | 13.8 | 9 | 0.13 | no | no | no | no | 3 |
| **NAIL DISTRESS** | | | | | | | | | | | |  |
| Aware with others | -0.61 | 0.05 | 3.60 | 498.0 | 17.4 | 8 | 0.03 | no | no | 1,2,3 | no | no |
| Avoid photos | -0.49 | 0.05 | -0.20 | 497.1 | 9.7 | 8 | 0.29 | no | 1 | no | no | 1,2,3 |
| Upset | -0.28 | 0.06 | 1.74 | 496.3 | 5.1 | 8 | 0.75 | 1,2,3 | no | no | no | 3 |
| Frustrated | -0.23 | 0.05 | -1.11 | 499.7 | 15.9 | 8 | 0.04 | no | no | no | no | no |
| People look | 0.28 | 0.05 | -1.40 | 496.3 | 16.6 | 8 | 0.03 | no | no | no | no | 2 |
| Self-conscious | 0.65 | 0.06 | 0.13 | 498.8 | 4.8 | 8 | 0.78 | no | no | no | no | no |
| Dislike | 0.69 | 0.06 | -0.39 | 498.8 | 10.5 | 8 | 0.23 | 1,2,3 | 1,2,3 | no | no | no |
| **NAIL SYMPTOMS** | | | | | | | | | | | |  |
| Skin bleeds | -0.41 | 0.06 | -0.88 | 421.4 | 12.3 | 7 | 0.09 | no | 1,2, | no | no | 1,2,3 |
| Nails throb | -0.35 | 0.06 | 2.90 | 419.8 | 7.0 | 7 | 0.42 | no | 1,2,3 | no | no | no |
| Skin red | -0.09 | 0.06 | -0.63 | 423.9 | 12.2 | 7 | 0.09 | no | no | no | no | no |
| Skin swollen | 0.04 | 0.06 | -0.79 | 423.1 | 7.0 | 7 | 0.43 | no | no | no | no | no |
| Pain in tips | 0.17 | 0.05 | -0.01 | 423.1 | 6.4 | 7 | 0.49 | no | no | no | no | no |
| Nails cause pain | 0.64 | 0.06 | 0.22 | 423.9 | 8.1 | 7 | 0.32 | no | no | no | no |  |
| **STRENGTH: FINGERNAILS** | | | | | | | | | | | |  |
| Peel | -0.05 | 0.10 | 2.99 | 116.6 | 7.6 | 2 | 0.02 | N/A | no | N/A | N/A | N/A |
| Split | -0.03 | 0.11 | -0.84 | 118.8 | 5.4 | 2 | 0.07 | N/A | no | N/A | N/A | N/A |
| Chip | 0.00 | 0.10 | 0.66 | 120.2 | 0.7 | 2 | 0.71 | N/A | no | N/A | N/A | N/A |
| Break | 0.08 | 0.10 | -1.67 | 119.5 | 4.8 | 2 | 0.09 | N/A | no | N/A | N/A | N/A |
| **PHYSICAL: FINGERNAILS** | | | | | | | | | | | |  |
| Button | -0.30 | 0.12 | -0.72 | 112.7 | 3.0 | 2 | 0.23 | N/A | no | N/A | N/A | N/A |
| Groom | -0.23 | 0.12 | 0.68 | 111.1 | 2.2 | 2 | 0.33 | N/A | no | N/A | N/A | N/A |
| Type | -0.07 | 0.12 | 0.74 | 111.1 | 1.3 | 2 | 0.53 | N/A | no | N/A | N/A | N/A |
| Daily activities | 0.12 | 0.12 | -0.90 | 112.7 | 1.4 | 2 | 0.49 | N/A | no | N/A | N/A | N/A |
| Chores | 0.18 | 0.11 | 0.63 | 111.9 | 0.9 | 2 | 0.64 | N/A | no | N/A | N/A | N/A |
| Clothes | 0.30 | 0.11 | 1.76 | 112.7 | 0.4 | 2 | 0.83 | N/A | no | N/A | N/A | N/A |
| **PHYSICAL: TOENAILS** | | | | | | | | | | | |  |
| Independent | -0.85 | 0.09 | 0.34 | 231.8 | 4.1 | 3 | 0.25 | no | no | no | no | N/A |
| Daily activities | -0.40 | 0.08 | -2.53 | 231.0 | 10.7 | 3 | 0.01 | no | no | no | no | N/A |
| Walk or move | 0.10 | 0.08 | -0.85 | 232.6 | 3.3 | 3 | 0.35 | no | no | no | no | N/A |
| Activities enjoy | 0.49 | 0.08 | 0.86 | 228.7 | 1.5 | 3 | 0.67 | no | no | no | no | N/A |
| Physically active | 0.67 | 0.08 | 2.15 | 231.8 | 3.3 | 3 | 0.34 | no | no | no | no | N/A |
| **TREATMENT OUTCOME** | | | | | | | | | | | |  |
| Glad had it | -0.85 | 0.08 | -0.09 | 319.9 | 5.8 | 5 | 0.32 | no | no | 1,2 | N/A | N/A |
| Would recommend | -0.59 | 0.07 | 1.34 | 319.9 | 2.5 | 5 | 0.78 | no | no | no | N/A | N/A |
| Worthwhile | -0.35 | 0.08 | -0.60 | 320.8 | 2.9 | 5 | 0.72 | no | no | no | N/A | N/A |
| Time and effort | -0.15 | 0.08 | -1.82 | 318.2 | 2.5 | 5 | 0.77 | no | no | no | N/A | N/A |
| Treatment worked | 0.35 | 0.08 | -2.30 | 319.9 | 8.5 | 5 | 0.13 | no | no | no | N/A | N/A |
| Pleased | 0.54 | 0.08 | -1.15 | 317.4 | 1.5 | 5 | 0.92 | no | no | no | N/A | N/A |
| Better than expected | 1.04 | 0.08 | 3.24 | 320.8 | 6.6 | 5 | 0.26 | no | no | no | N/A | N/A |

*In DIF analysis, 1 = random sample 1 was significant; 2 = random sample 2 was significant; 3 = random sample 3 was significant

**Figure S2: Person-item threshold distributions for each NAIL-Q scale from RMT analysis**

| **NAIL APPEARANCE** | 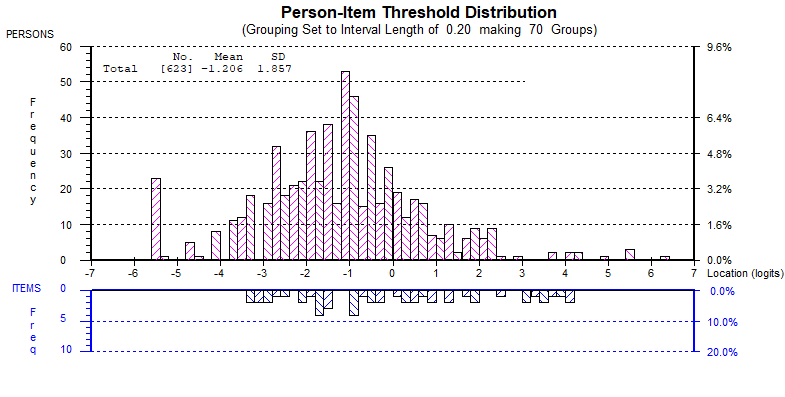 |
| --- | --- |
| **NAIL DISTRESS** | 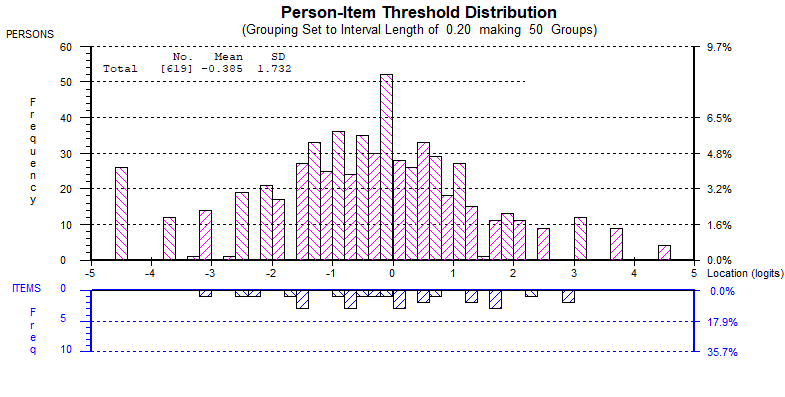 |
| **NAIL SYMPTOMS** | 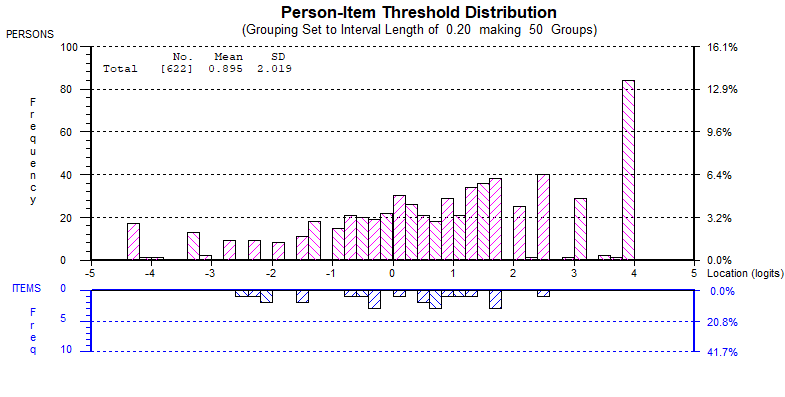 |
| **STRENGTH: FINGERNAILS** | 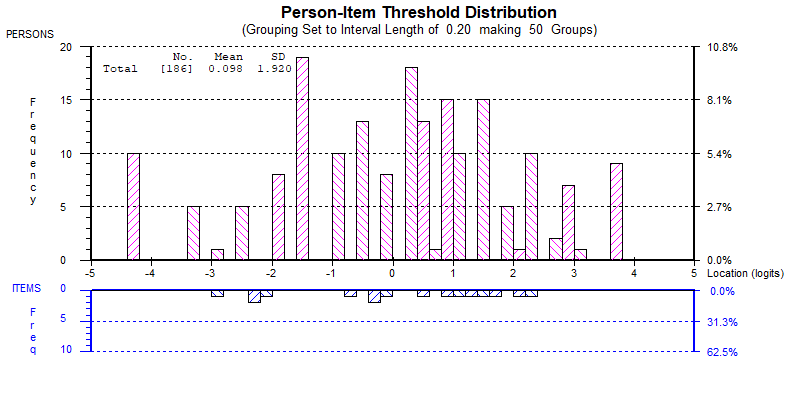 |
| **PHYSICAL: FINGERNAILS** | 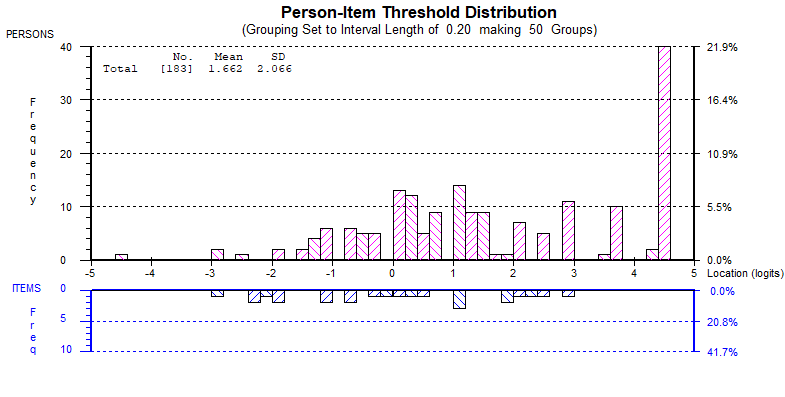 |
| **PHYSICAL: TOENAILS** | 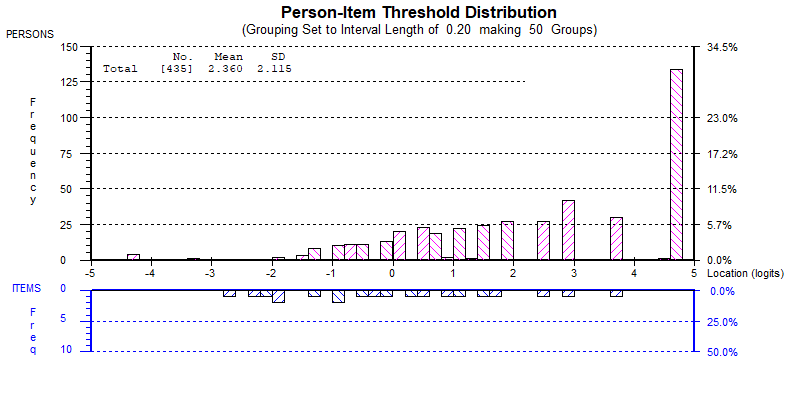 |
| **TREATMENT OUTCOME** | 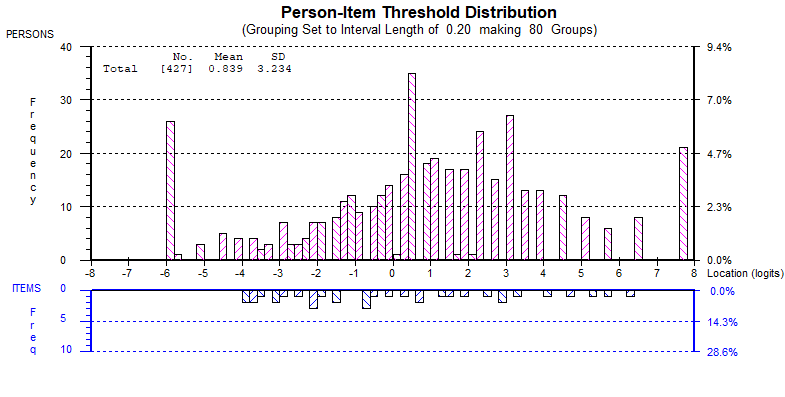 |

**Table S6: How would you describe the SEVERITY of your nail condition?**

| Scale |  | Mean | SD | 95% CI | | N | P-value |
| --- | --- | --- | --- | --- | --- | --- | --- |
| Lower Bound | Upper Bound |
| APPEARANCE | Mild | 46 | 12 | 44 | 47 | 228 | p<0.001 |
| Moderate | 39 | 15 | 37 | 41 | 339 |
| Severe/Very severe | 26 | 16 | 22 | 30 | 56 |
| DISTRESS | Mild | 55 | 17 | 53 | 57 | 227 | p<0.001 |
| Moderate | 43 | 17 | 41 | 44 | 336 |
| Severe/Very severe | 27 | 17 | 23 | 31 | 56 |
| SYMPTOMS | Mild | 71 | 23 | 68 | 74 | 228 | p<0.001 |
| Moderate | 58 | 24 | 55 | 60 | 338 |
| Severe/Very severe | 47 | 28 | 39 | 54 | 56 |
| STRENTH: FINGERNAILS | Mild | 57 | 24 | 52 | 63 | 72 | P=0.045 |
| Moderate | 49 | 26 | 44 | 54 | 101 |
| Severe/Very severe | 43 | 28 | 26 | 59 | 13 |
| PHYSICAL: FINGERNAIL | Mild | 78 | 21 | 73 | 83 | 72 | p<0.001 |
| Moderate | 64 | 21 | 60 | 68 | 98 |
| Severe/Very severe | 47 | 27 | 30 | 63 | 13 |
| PHYSICAL: TOENAILS | Mild | 84 | 19 | 81 | 87 | 155 | p<0.001 |
| Moderate | 71 | 21 | 68 | 74 | 237 |
| Severe/Very severe | 60 | 27 | 52 | 69 | 43 |

**Table S7: What side is your nail condition on?**

| Scale |  | Mean | Std. Deviation | N | P-value |
| --- | --- | --- | --- | --- | --- |
| APPEARANCE | one side | 43 | 14 | 272 | p<0.001 |
| both sides | 38 | 16 | 351 |
| DISTRESS | one side | 48 | 17 | 269 | p=0.027 |
| both sides | 44 | 21 | 350 |

**Table S8: How PAINFUL is your nail condition?**

| Scale | Response Options | Mean | Std. Deviation | 95% CI | | N | P-value |
| --- | --- | --- | --- | --- | --- | --- | --- |
| SYMPTOMS | Lower Bound | Upper Bound |
| No pain | 77 | 24 | 74 | 80 | 227 | p<0.001 |
| Mild | 59 | 20 | 56 | 61 | 234 |
| Moderate | 46 | 20 | 43 | 49 | 139 |
| Severe/Very severe | 29 | 26 | 18 | 41 | 22 |

**Table S9: How EMBARRASSING is your nail condition?**

| Scale | Response Options | Mean | Std. Deviation | 95% CI | | N | P-value |
| --- | --- | --- | --- | --- | --- | --- | --- |
| Lower Bound | Upper Bound |
| APPEARANCE | Not at all | 51 | 14 | 48 | 53 | 116 | p<0.001 |
| A little | 42 | 12 | 41 | 44 | 276 |
| Moderately | 37 | 15 | 34 | 39 | 146 |
| Extremely | 25 | 15 | 22 | 29 | 85 |
| DISTRESS | Not at all | 64 | 16 | 61 | 67 | 115 | p<0.001 |
| A little | 50 | 14 | 48 | 51 | 274 |
| Moderately | 38 | 13 | 35 | 40 | 145 |
| Extremely | 22 | 15 | 19 | 25 | 85 |
| SYMPTOMS | Not at all | 70 | 23 | 65 | 74 | 116 | p<0.001 |
| A little | 64 | 24 | 61 | 67 | 275 |
| Moderately | 57 | 24 | 53 | 61 | 146 |
| Extremely | 50 | 29 | 44 | 57 | 85 |

**Table S10: How much does your NAIL condition INTERFERE with doing your usual daily activities?**

| Scale | Response Options | Mean | Std. Deviation | 95% CI | | N | P-value |
| --- | --- | --- | --- | --- | --- | --- | --- |
| Lower Bound | Upper Bound |
| DISTRESS | Not at all | 53 | 19 | 50 | 55 | 231 | p<0.001 |
| Little bit | 45 | 17 | 43 | 47 | 316 |
| Quite a bit/ Very much | 28 | 17 | 24 | 32 | 72 |
| SYMPTOMS | Not at all | 75 | 24 | 72 | 78 | 232 | p<0.001 |
| Little bit | 58 | 21 | 55 | 60 | 317 |
| Quite a bit/ Very much | 35 | 25 | 30 | 41 | 73 |
| PHYSICAL: FINGERNAILS | Not at all | 89 | 15 | 86 | 93 | 61 | p<0.001 |
| Little bit | 62 | 18 | 58 | 65 | 100 |
| Quite a bit/ Very much | 42 | 15 | 36 | 49 | 22 |
| STRENGTH: FINGERNAILS | Not at all | 66 | 22 | 60 | 71 | 62 | p<0.001 |
| Little bit | 46 | 24 | 41 | 50 | 101 |
| Quite a bit/ Very much | 43 | 29 | 30 | 55 | 23 |
| PHYSICAL: TOENAILS | Not at all | 91 | 14 | 89 | 93 | 169 | p<0.001 |
| Little bit | 68 | 19 | 66 | 71 | 216 |
| Quite a bit/ Very much | 46 | 18 | 41 | 52 | 50 |

**Table S11:  How much worse or better is your NAIL condition now compared with before you had the treatment?**

| Scale | Response Options | Mean | Std. Deviation | 95% CI | | N | P-value |
| --- | --- | --- | --- | --- | --- | --- | --- |
| Lower Bound | Upper Bound |
| OUTCOME | A lot / A little worse | 28 | 22 | 18 | 38 | 21 | p<0.001 |
| Same | 36 | 21 | 32 | 40 | 134 |
| A little better | 58 | 13 | 56 | 60 | 222 |
| A lot better | 77 | 16 | 74 | 80 | 103 |
